# Supplementary material
Source: ML conference proceedings conference paper supplement (https://openreview.net/forum?id=sU16011qnm)
Supplement: supplementary_material [file attachment]

# Supplementary Materials: Semantic-aware Next-Best-View for Multi-DoFs Mobile System in Search-and-Acquisition based Visual Perception

Anonymous Authors

## 1 SUPPLEMENTARY VIDEOS

In this section, we provide two videos that supplement our main content and serve as a visual aid to demonstrate the performance of our proposed method in a simulation experiment. The experimental setting showcased in these videos follows the third one in subsection **Experimental Setup**, where the experiment is conducted in the Kitchen and Dining Room Scene, and the refrigerator and sink are designated as the specific targets.

**Video 1: Exp\_Comparison.mp4:** This video presents a side-by-side comparison of our method against a non-semantic-aware approach. The purpose of this video is to provide a clear visualization

of the differences between our method and the non-semantic-aware method, highlighting the advantages of our semantically-aware approach.

**Video 2: S-NBV\_Acquicision\_Side\_View.mp4:** This video offers an in-depth look at the acquisition process, focusing on how our method effectively perceives the specified objects. It aims to provide an intuitive understanding of the comprehensive coverage achieved by our method when interacting with and acquiring information about the designated objects.
